# Supplementary material for: Temporal Heterogeneity of HER2 Expression and Spatial Heterogeneity of 18F-FDG Uptake Predicts Treatment Outcome of Pyrotinib in Patients with HER2-Positive Metastatic Breast Cancer
Source: MDPI journal article supplement (doi:10.3390/cancers14163973), 2022-08-17
Supplement: s1 [file s1]

Table S1. Associations between clinical factors and tumor heterogeneity.

| Characteristics                                 | Temporal tumor heterogeneity                   |      |                                               |      |                      | Spatial tumor heterogeneity         |      |                                    |      |         |                                     |      |                                    |      |         |
|-------------------------------------------------|------------------------------------------------|------|-----------------------------------------------|------|----------------------|-------------------------------------|------|------------------------------------|------|---------|-------------------------------------|------|------------------------------------|------|---------|
|                                                 | Patients with heterogeneous HER2 status<br>N=9 |      | Patients with homogeneous HER2 status<br>N=27 |      | P value <sup>a</sup> | Patients with high HI-intra<br>N=26 |      | Patients with low HI-intra<br>N=25 |      | P value | Patients with high HI-inter<br>N=31 |      | Patients with low HI-inter<br>N=20 |      | P value |
|                                                 | No.                                            | %    | No.                                           | %    |                      | No.                                 | %    | No.                                | %    |         | No.                                 | %    | No.                                | %    |         |
| Age                                             | 1.000                                          |      |                                               |      |                      | 0.328                               |      |                                    |      |         | 0.654                               |      |                                    |      |         |
| ≥54 years                                       | 5                                              | 55.6 | 13                                            | 48.1 |                      | 15                                  | 57.7 | 11                                 | 44.0 |         | 15                                  | 48.4 | 11                                 | 55.0 |         |
| <54 years                                       | 4                                              | 44.4 | 14                                            | 51.9 |                      | 11                                  | 42.3 | 14                                 | 56.0 |         | 16                                  | 51.6 | 9                                  | 45.0 |         |
| Histological Grade                              | 1.000                                          |      |                                               |      |                      | 0.202                               |      |                                    |      |         | 0.784                               |      |                                    |      |         |
| Grade 2                                         | 3                                              | 33.3 | 8                                             | 32.0 |                      | 9                                   | 34.6 | 4                                  | 18.2 |         | 8                                   | 28.6 | 5                                  | 25.0 |         |
| Grade 3                                         | 6                                              | 66.7 | 17                                            | 68.0 |                      | 17                                  | 65.4 | 18                                 | 81.8 |         | 20                                  | 71.4 | 15                                 | 75.0 |         |
| Disease-free interval <sup>b</sup>              | 0.035*                                         |      |                                               |      |                      | 0.731                               |      |                                    |      |         | 0.213                               |      |                                    |      |         |
| <24 months                                      | 3                                              | 33.3 | 18                                            | 78.3 |                      | 16                                  | 66.7 | 15                                 | 71.4 |         | 16                                  | 61.5 | 15                                 | 78.9 |         |
| >24 months                                      | 6                                              | 66.7 | 5                                             | 21.7 |                      | 8                                   | 33.3 | 6                                  | 28.6 |         | 10                                  | 38.5 | 4                                  | 21.1 |         |
| No. of metastatic sites                         | 0.392                                          |      |                                               |      |                      | 0.057                               |      |                                    |      |         | 0.003*                              |      |                                    |      |         |
| 1                                               | 1                                              | 11.1 | 9                                             | 33.3 |                      | 5                                   | 19.2 | 11                                 | 44.0 |         | 5                                   | 16.1 | 11                                 | 55.0 |         |
| ≥2                                              | 8                                              | 88.9 | 18                                            | 66.7 |                      | 21                                  | 80.8 | 14                                 | 56.0 |         | 26                                  | 83.9 | 9                                  | 45.0 |         |
| Visceral disease                                | 0.706                                          |      |                                               |      |                      | 0.886                               |      |                                    |      |         | 0.029*                              |      |                                    |      |         |
| Yes                                             | 5                                              | 55.6 | 12                                            | 44.4 |                      | 13                                  | 50.0 | 12                                 | 48.0 |         | 19                                  | 61.3 | 6                                  | 30.0 |         |
| No                                              | 4                                              | 44.4 | 15                                            | 44.6 |                      | 13                                  | 50.0 | 13                                 | 52.0 |         | 12                                  | 38.7 | 14                                 | 70.0 |         |
| Treatment line <sup>c</sup>                     | 1.000                                          |      |                                               |      |                      | 1.000                               |      |                                    |      |         | 1.000                               |      |                                    |      |         |
| 1-2                                             | 8                                              | 88.9 | 22                                            | 81.5 |                      | 22                                  | 84.6 | 22                                 | 88.0 |         | 24                                  | 77.4 | 20                                 | 100  |         |
| ≥3                                              | 1                                              | 11.1 | 5                                             | 18.5 |                      | 4                                   | 15.4 | 3                                  | 12.0 |         | 7                                   | 22.6 | 0                                  | 0    |         |
| Resistance to previous trastuzumab <sup>d</sup> | 1.000                                          |      |                                               |      |                      | 0.206                               |      |                                    |      |         | 0.301                               |      |                                    |      |         |
| Yes                                             | 5                                              | 55.6 | 14                                            | 51.9 |                      | 11                                  | 42.3 | 15                                 | 60.0 |         | 14                                  | 45.2 | 12                                 | 60.0 |         |
| No                                              | 4                                              | 44.4 | 13                                            | 48.1 |                      | 15                                  | 57.7 | 10                                 | 40.0 |         | 17                                  | 54.8 | 8                                  | 40.0 |         |

<sup>a</sup>. Chi-squared test or the Fisher exact test was applied. \*p<0.05 is considered significant.

<sup>b</sup>In patients who received radical surgery. <sup>c</sup>Treatment line in which pyrotinib was administered. <sup>d</sup>Resistance to trastuzumab was defined as relapse during or within 6 months after adjuvant trastuzumab or progression within 3 months of trastuzumab treatment for metastatic disease.

Table S2. Associations between PET parameters and PFS

| Factors |          | No. of patients | PFS (months) | 95% CI    | p value |
|---------|----------|-----------------|--------------|-----------|---------|
| SUVmax  | >7.96    | 38              | 11.1         | 6.6-15.6  | 0.008*  |
|         | <7.96    | 13              | NR           |           |         |
| SUVmean | >3.43    | 43              | 11.2         | 7.4-15.0  | 0.077   |
|         | <3.43    | 7               | NR           |           |         |
| COV     | >0.15    | 27              | 11.1         | 7.2-15.0  | 0.026*  |
|         | <0.15    | 24              | 25.3         | 5.0-45.6  |         |
| MTV     | >3.34 mL | 26              | 14.4         | 10.9-17.9 | 0.865   |
|         | <3.34 mL | 25              | 13.7         | 8.7-18.8  |         |
| TLG     | >74.89 g | 26              | 11.2         | 8.9-13.5  | 0.024*  |
|         | <74.89 g | 25              | NR           | NR        |         |

Abbreviations: PET, positron emission tomography; PFS, progression-free survival; No., Number; CI, confidence interval; SUVmax, maximum standardized uptake value; NR, Not reached; SUVmean, mean standardized uptake value; COV, coefficient of variance; MTV, metabolic tumor volume; TLG, total lesion glycolysis. \* p< 0.05

Table S3. Association between temporal and spatial heterogeneity in terms of IHC results and <sup>18</sup>F-FDG uptake.

| Factors     |               | HI-inter<br>Median (P25, P75) | Z<br>P value | HI-intra<br>Median (P25, P75) | Z<br>P value |
|-------------|---------------|-------------------------------|--------------|-------------------------------|--------------|
| HER2 status | heterogeneous | 3.44(2.27, 4.16)              | -2.289       | 1.69(1.67, 1.76)              | -0.785       |
|             | homogeneous   | 1.47(1.0, 2.61)               | 0.022*       | 1.69(1.63, 1.72)              | 0.432        |
| HR status   | heterogeneous | 1.55(1.06, 3.36)              | -0.071       | 1.69(1.65, 1.74)              | -0.318       |
|             | homogeneous   | 1.94(1.0, 3.58)               | 0.943        | 1.69(1.65, 1.72)              | 0.751        |

| Factors  |      | HER2 status   |             | P value <sup>a</sup> | HR status     |             | P value |
|----------|------|---------------|-------------|----------------------|---------------|-------------|---------|
| HI-inter | High | heterogeneous | homogeneous | 0.062                | heterogeneous | homogeneous | 1.000   |
|          |      | 36.4%         | 63.6%       |                      | 27.3%         | 72.7%       |         |
|          | Low  | 7.1%          | 92.9%       |                      | 28.6%         | 71.4%       |         |
| HI-intra | High | 25.0%         | 75.0%       | 1.000                | 31.3%         | 68.8%       | 0.481   |
|          | Low  | 25.0%         | 75.0%       |                      | 25.0%         | 75.0%       |         |

<sup>a</sup>Fisher's Exact Test was applied. Abbreviations: IHC, immunohistochemistry; FDG, fluorodeoxyglucose; HI-intra, intratumoral heterogeneity index; HI-inter, intertumoral heterogeneity index; HR, hormone receptor; HER2, human epidermal growth factor receptor 2. \*p<0.05 is considered significant.
